# Supplementary material
Source: PubMed Central journal article supplement (PMC11029835)

## Supplemental Fig 1

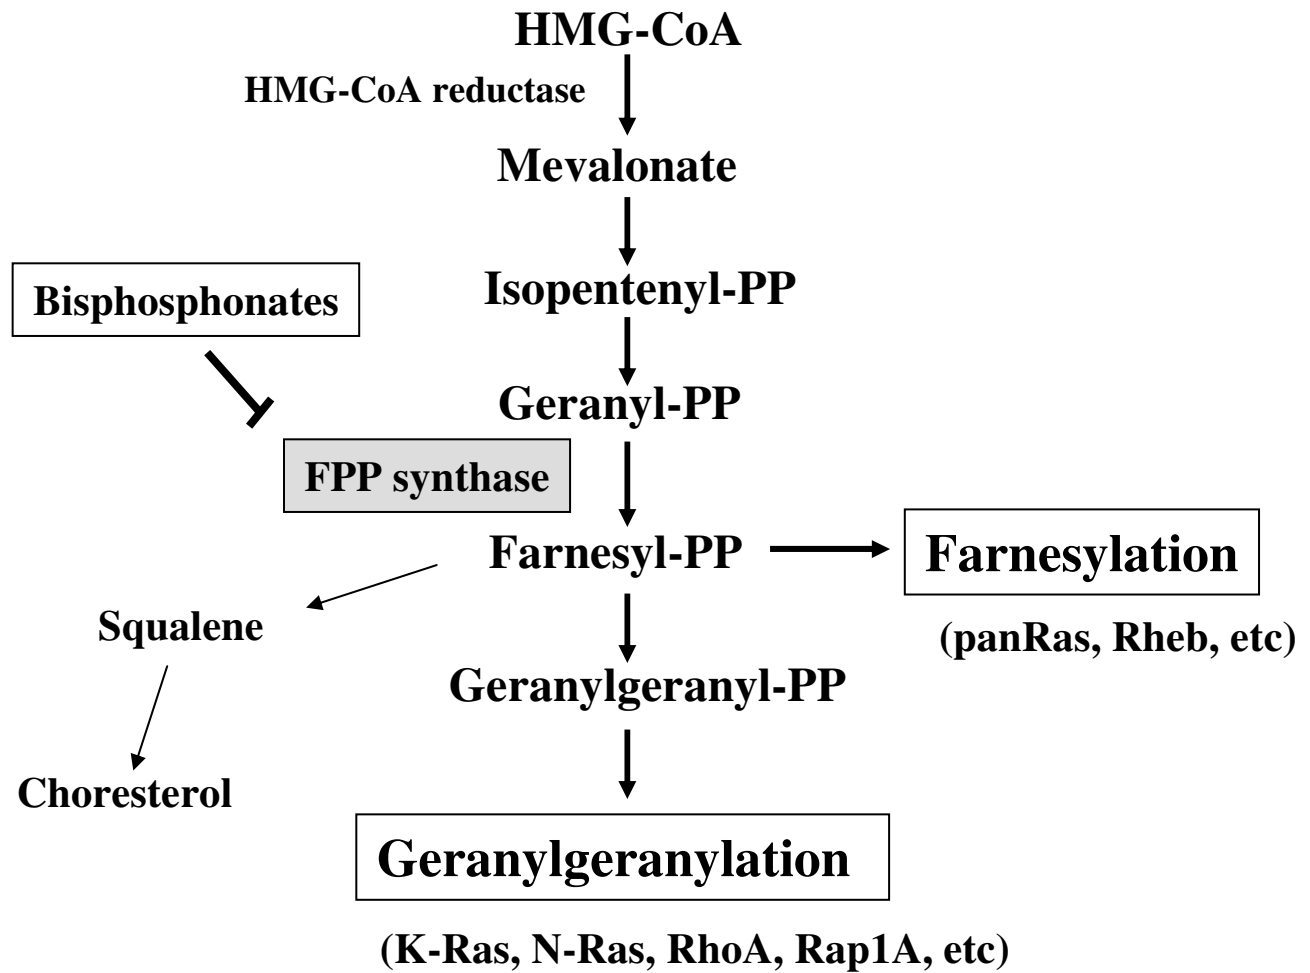

Supplement: 262_2008_571_MOESM1_ESM.pdf [file 262_2008_571_MOESM1_ESM.pdf]
